# Supplementary material
Source: Springer Nature journal article supplement (https://www.springermedizin.de/resource/supplementary/12889_2011_3084_MOESM1_ESM.pdf/9488090)
Supplement: MOESM1 [file 9488090]

**Randomization of departments to study arm 1, 2 or 3  
(departments: N=86; employees: N=1731)**

**Study arm 1: control  
group (N=561)**

**Study arm 2: OP-care  
group (N=591)**

**Study arm 3: e-mental  
health group (N=579)**

**Informed Consent + Baseline questionnaire (T0)**

Participants receive  
screening results on  
mental health and  
work functioning

Participants receive  
screening results on  
mental health and  
work functioning

Participants with  
mental health  
complaints or impaired  
work functioning:  
invitation for OP-  
consultation

All participants:  
tailored choice of self-  
help e-mental health  
interventions

**Follow-up questionnaire (T1) at 3 months**

**Follow-up questionnaire (T2) at 6 months**

Participants receive  
screening results on  
mental health and  
work functioning

All participants:  
tailored choice of self-  
help e-mental health  
interventions
